# Supplementary material
Source: Springer Nature journal article supplement (https://www.springermedizin.de/resource/supplementary/12967_2013_1759_MOESM13_ESM.pdf/9575252)
Supplement: MOESM13 [file 9575252]

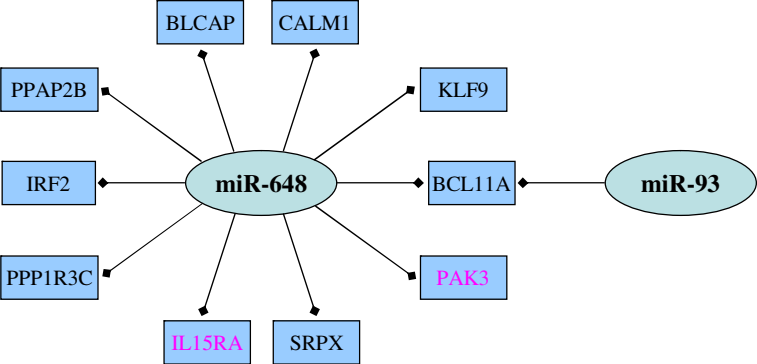

—◆— Regulations

○ microRNA

Gene Prostate cancer associate gene

Gene Genes involved in other cancers
